# Supplementary material
Source: bioRxiv or medRxiv preprint supplement (https://www.biorxiv.org/highwire/filestream/29910/field_highwire_adjunct_files/0/054924-1.pdf)

**a**

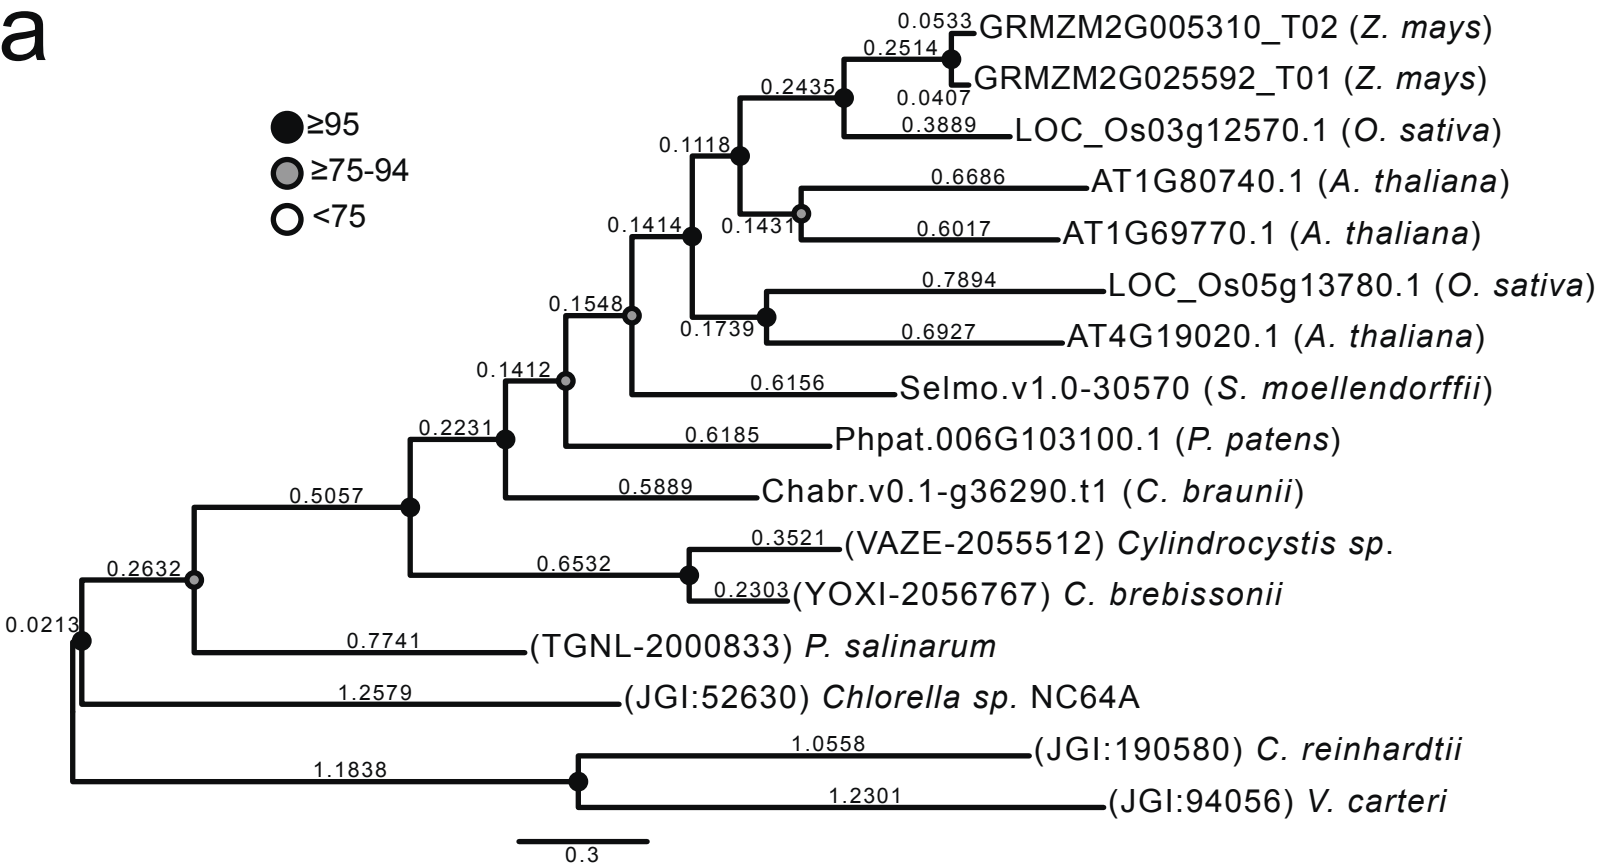

**b**

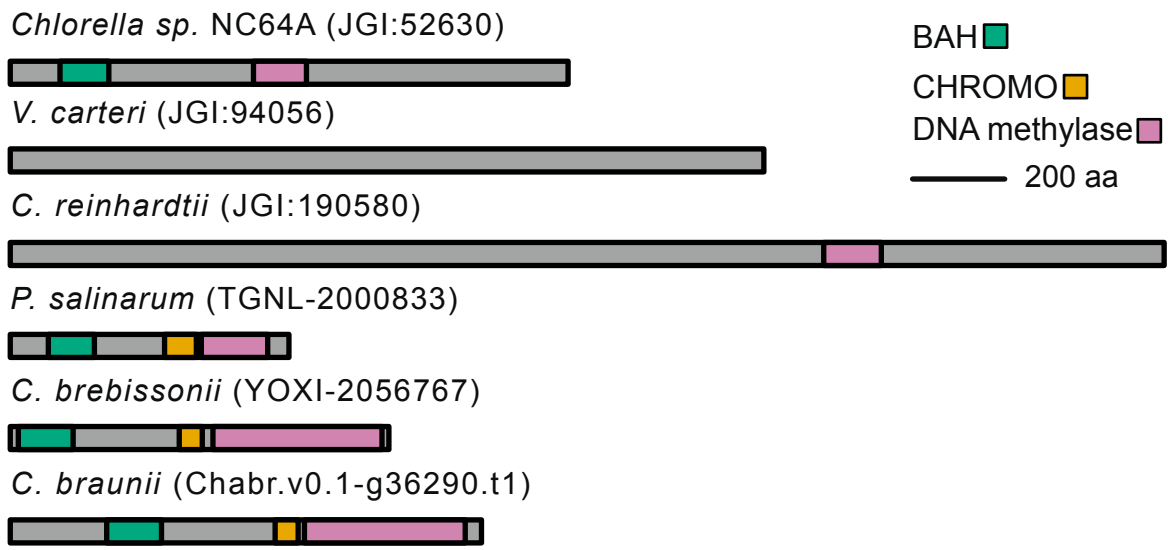

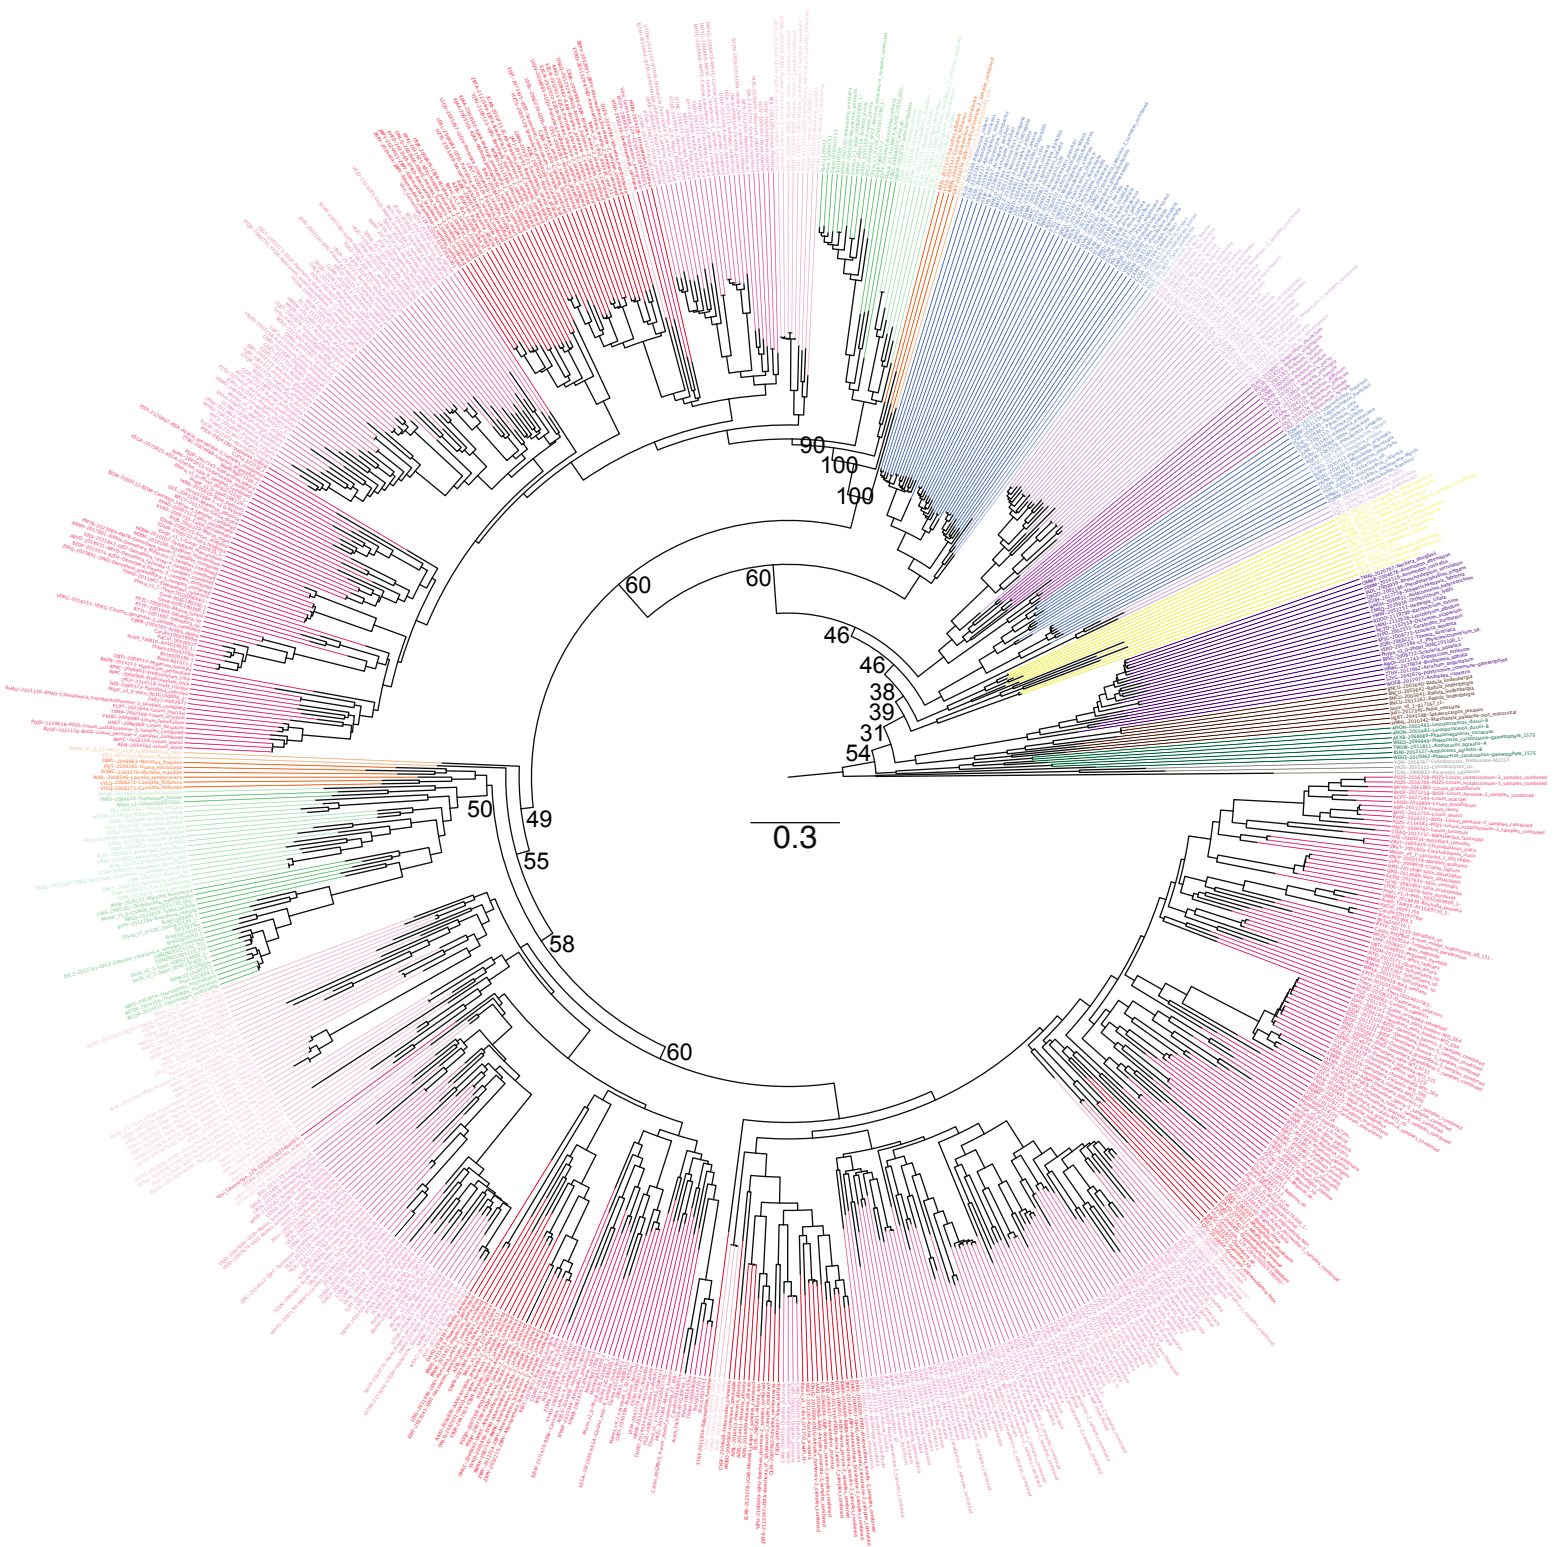

|               |        |          |       |          |             |      |           |          |      |            |        |      |      |      |        |      |           |
|---------------|--------|----------|-------|----------|-------------|------|-----------|----------|------|------------|--------|------|------|------|--------|------|-----------|
| Embryophytes  |        |          |       |          |             |      |           |          |      |            |        |      |      | Chl. |        |      |           |
| Tracheophytes |        |          |       |          |             |      |           |          |      | Bryophytes |        |      | Chl. |      |        |      |           |
| Angiosperms   |        |          |       |          | Gymnosperms |      |           | Ferns    | Lyc. | Hor.       | Mosses | Liv. | Chl. |      |        |      |           |
| Eudicots      |        |          |       | Monocots |             |      |           |          |      |            |        |      |      |      |        |      |           |
| Core          | Rosids | Asterids | Basal | Com.     | Monocots    | Mag. | Bas.-mos. | Conifers | Cyc. | Gin.       | Eus.   | Lep. | Lyc. | Hor. | Mosses | Liv. | Gre. Alg. |



a

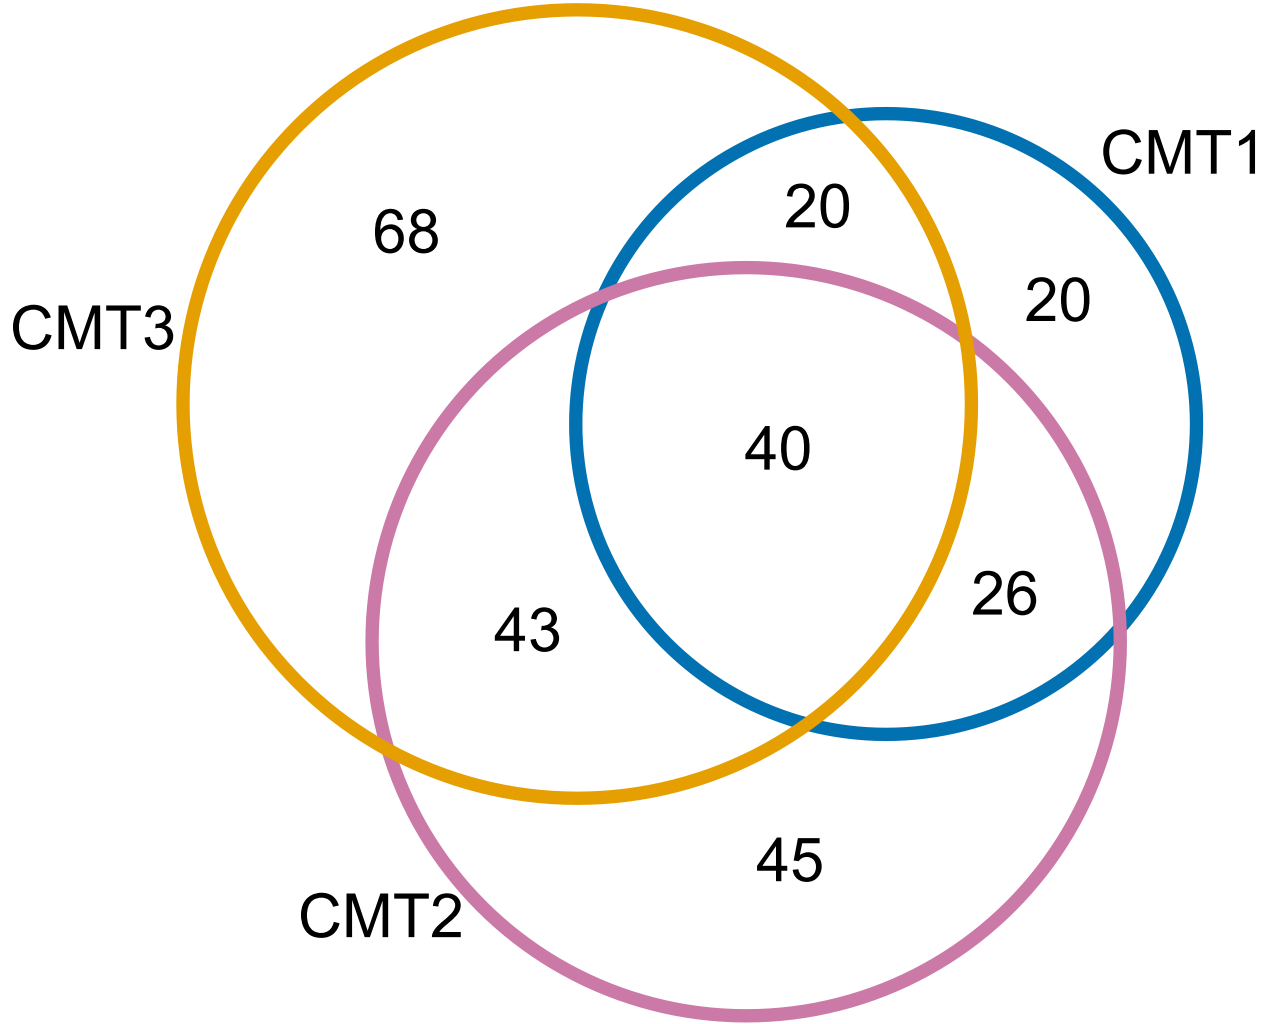

b

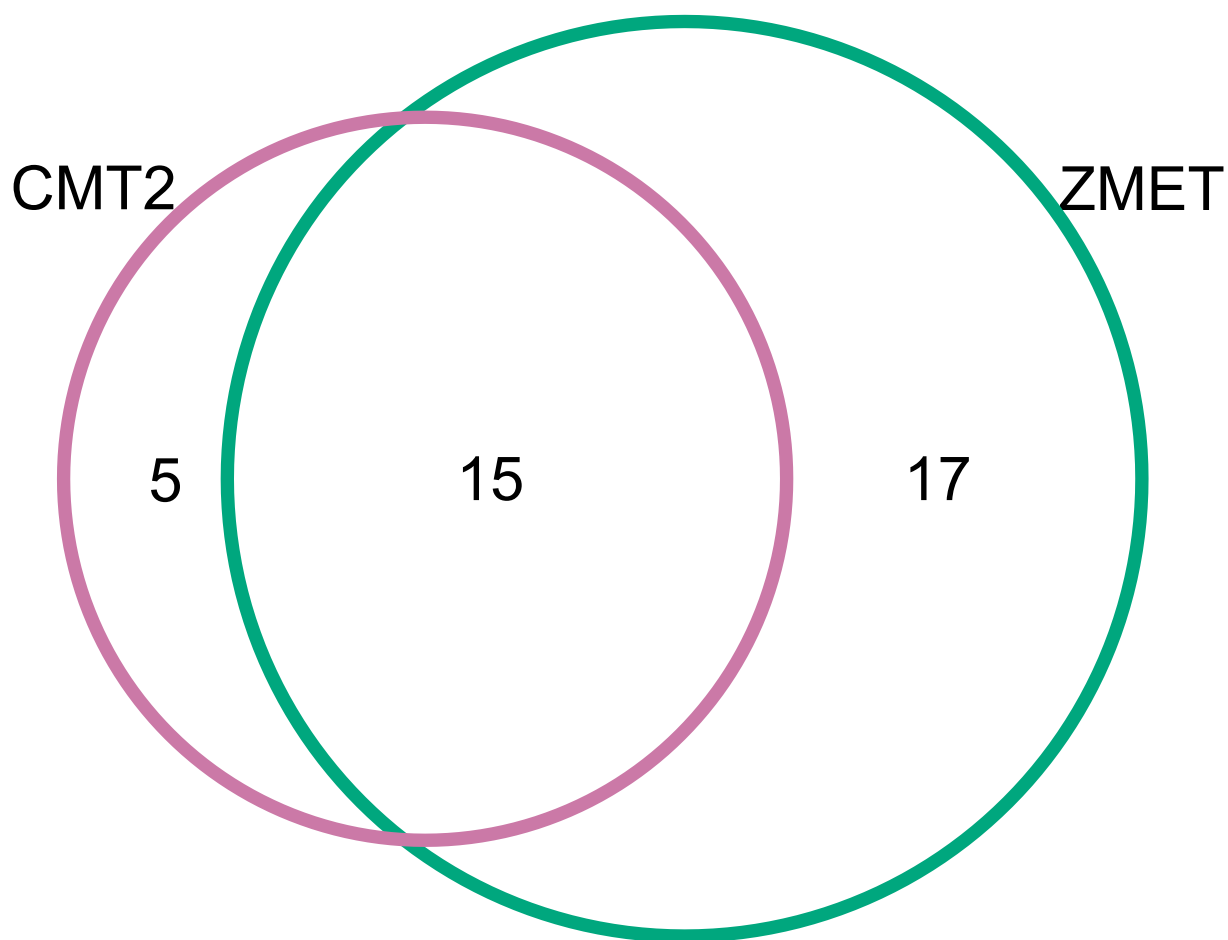

■ mCG ■ mCHG ■ mCHH

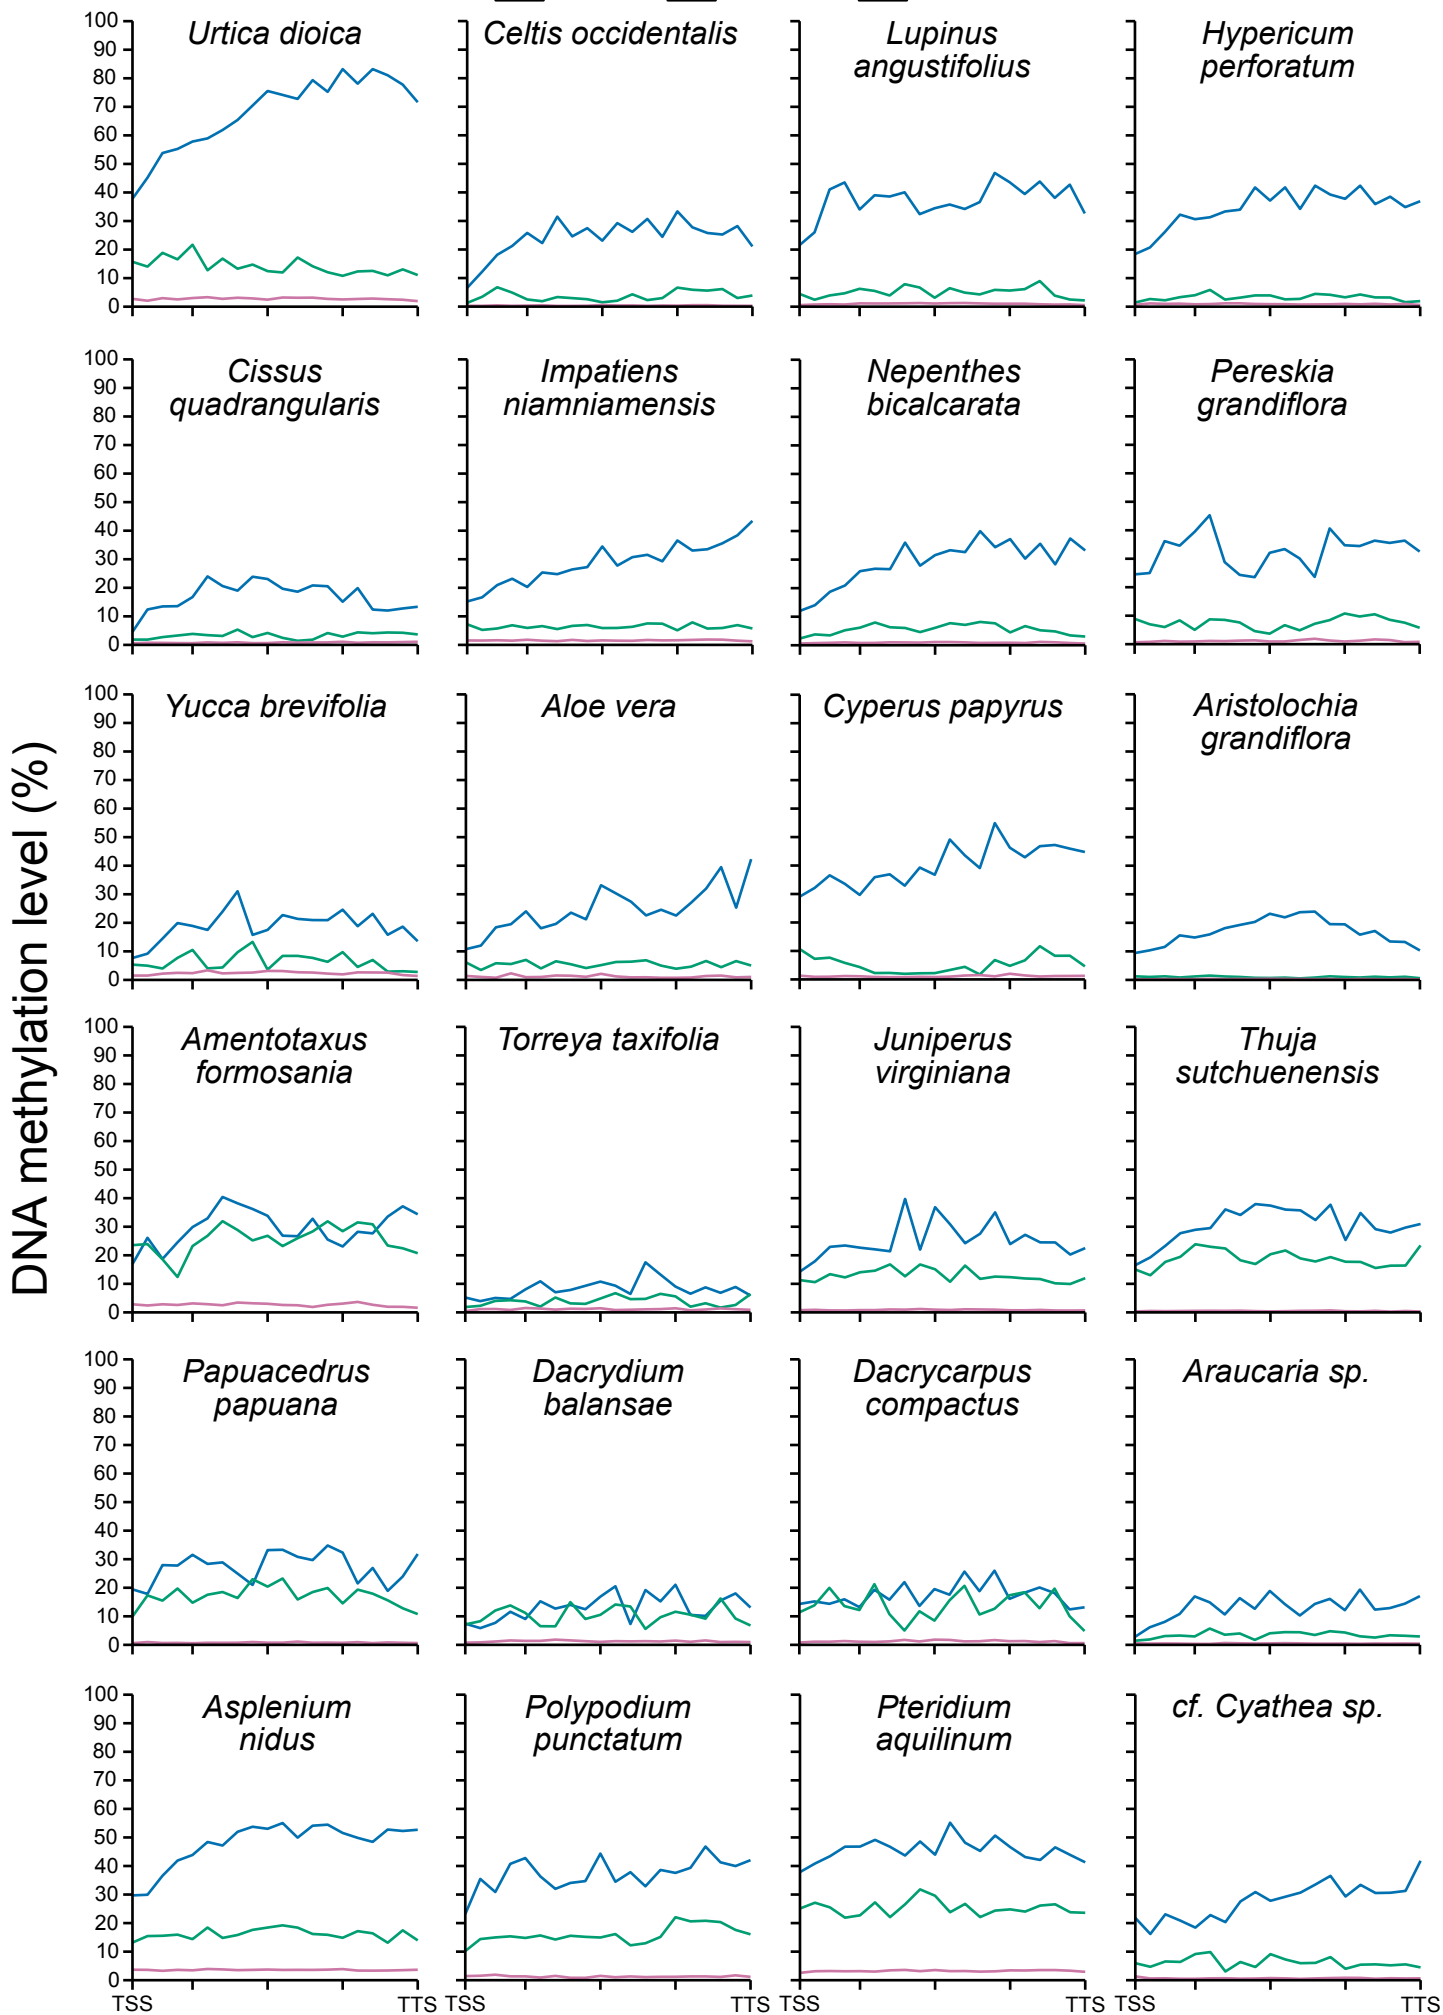

**a**

|               |        |          |       |          |          |      |           |          |            |      |
|---------------|--------|----------|-------|----------|----------|------|-----------|----------|------------|------|
| Embryophytes  |        |          |       |          |          |      |           |          |            |      |
| Tracheophytes |        |          |       |          |          |      |           |          | Bryophytes |      |
| Angiosperms   |        |          |       |          |          |      | Gym.      | Mosses   | Liv.       |      |
| Eudicots      |        |          |       | Monocots |          |      |           |          |            |      |
| Core          | Rosids | Asterids | Basal | Com.     | Monocots | Mag. | Bas.-mos. | Conifers | Mosses     | Liv. |

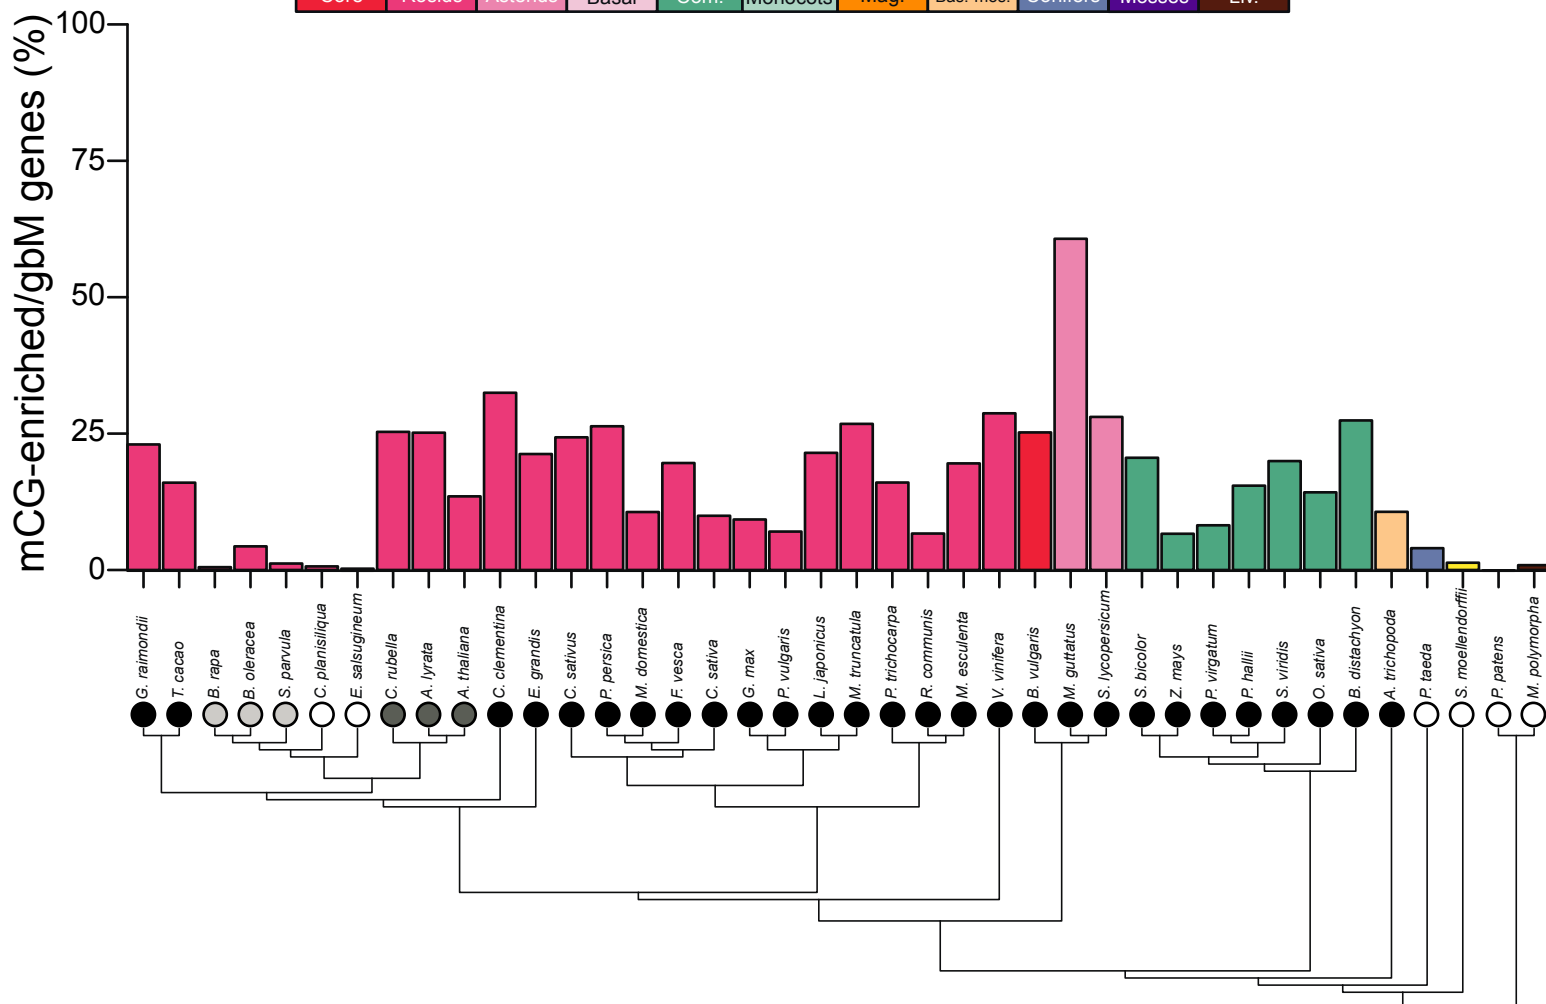**b**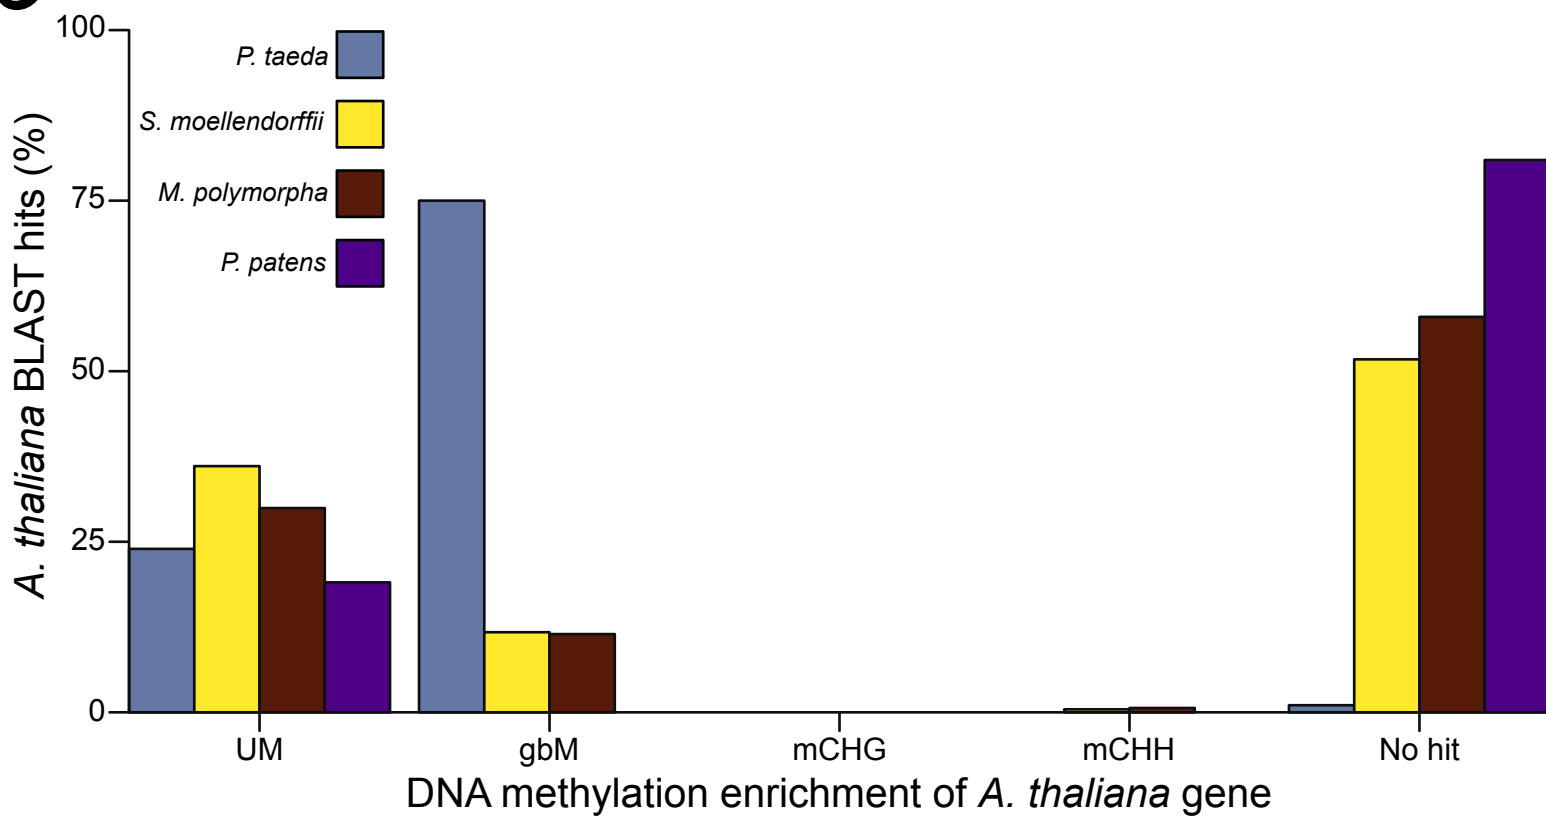

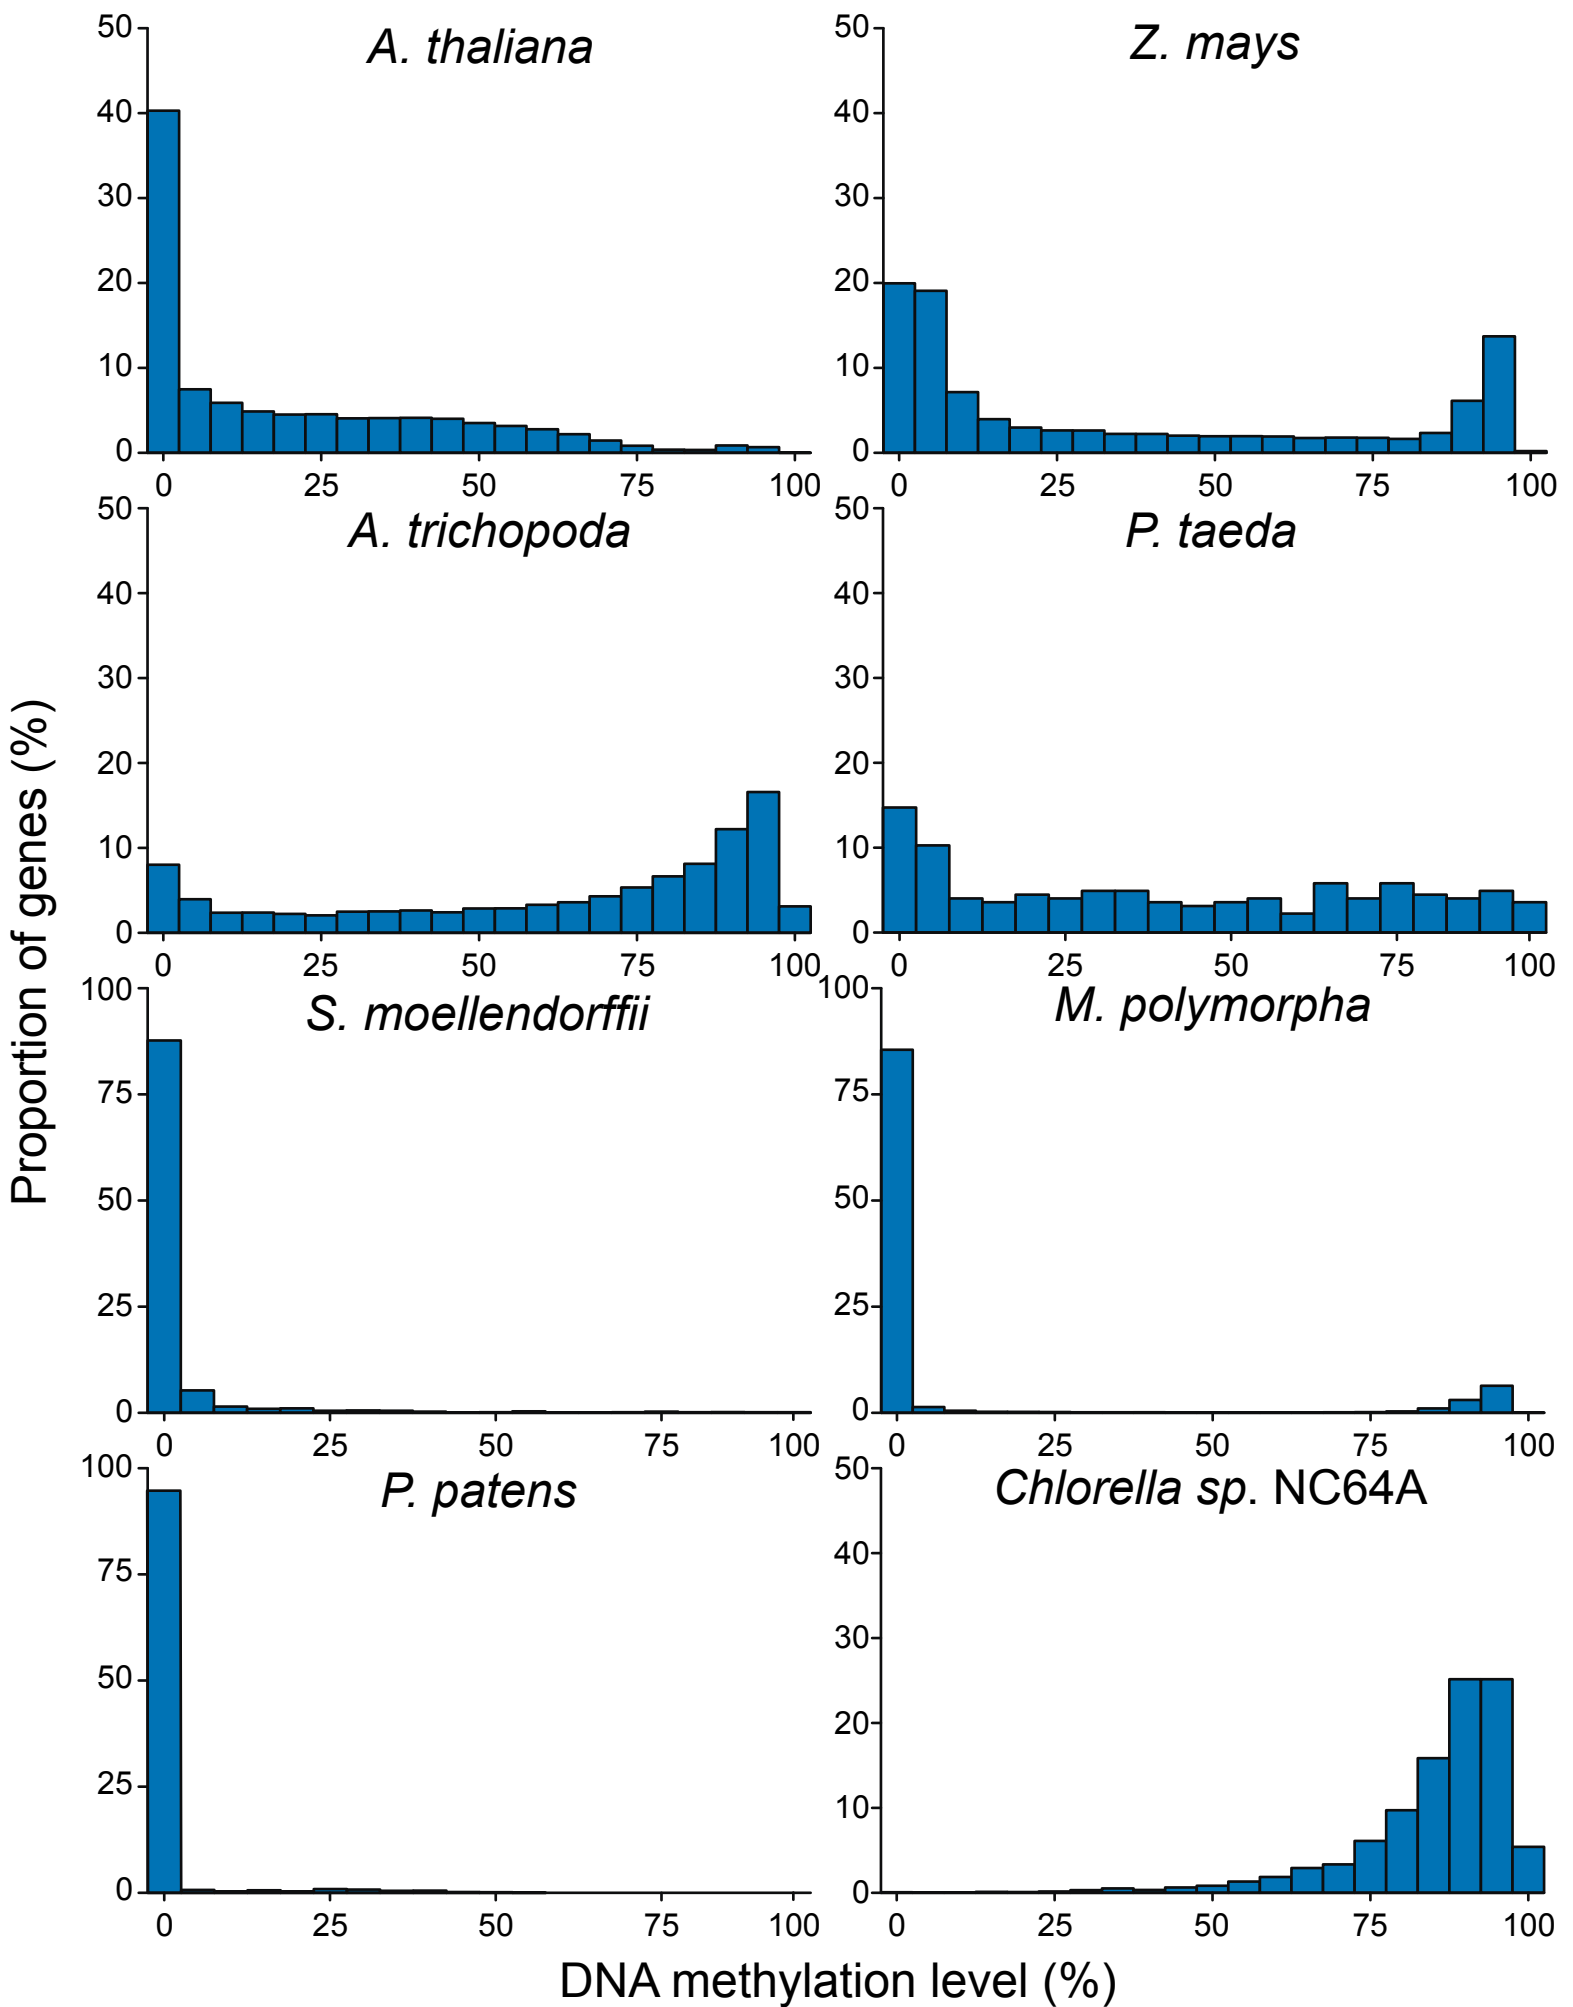

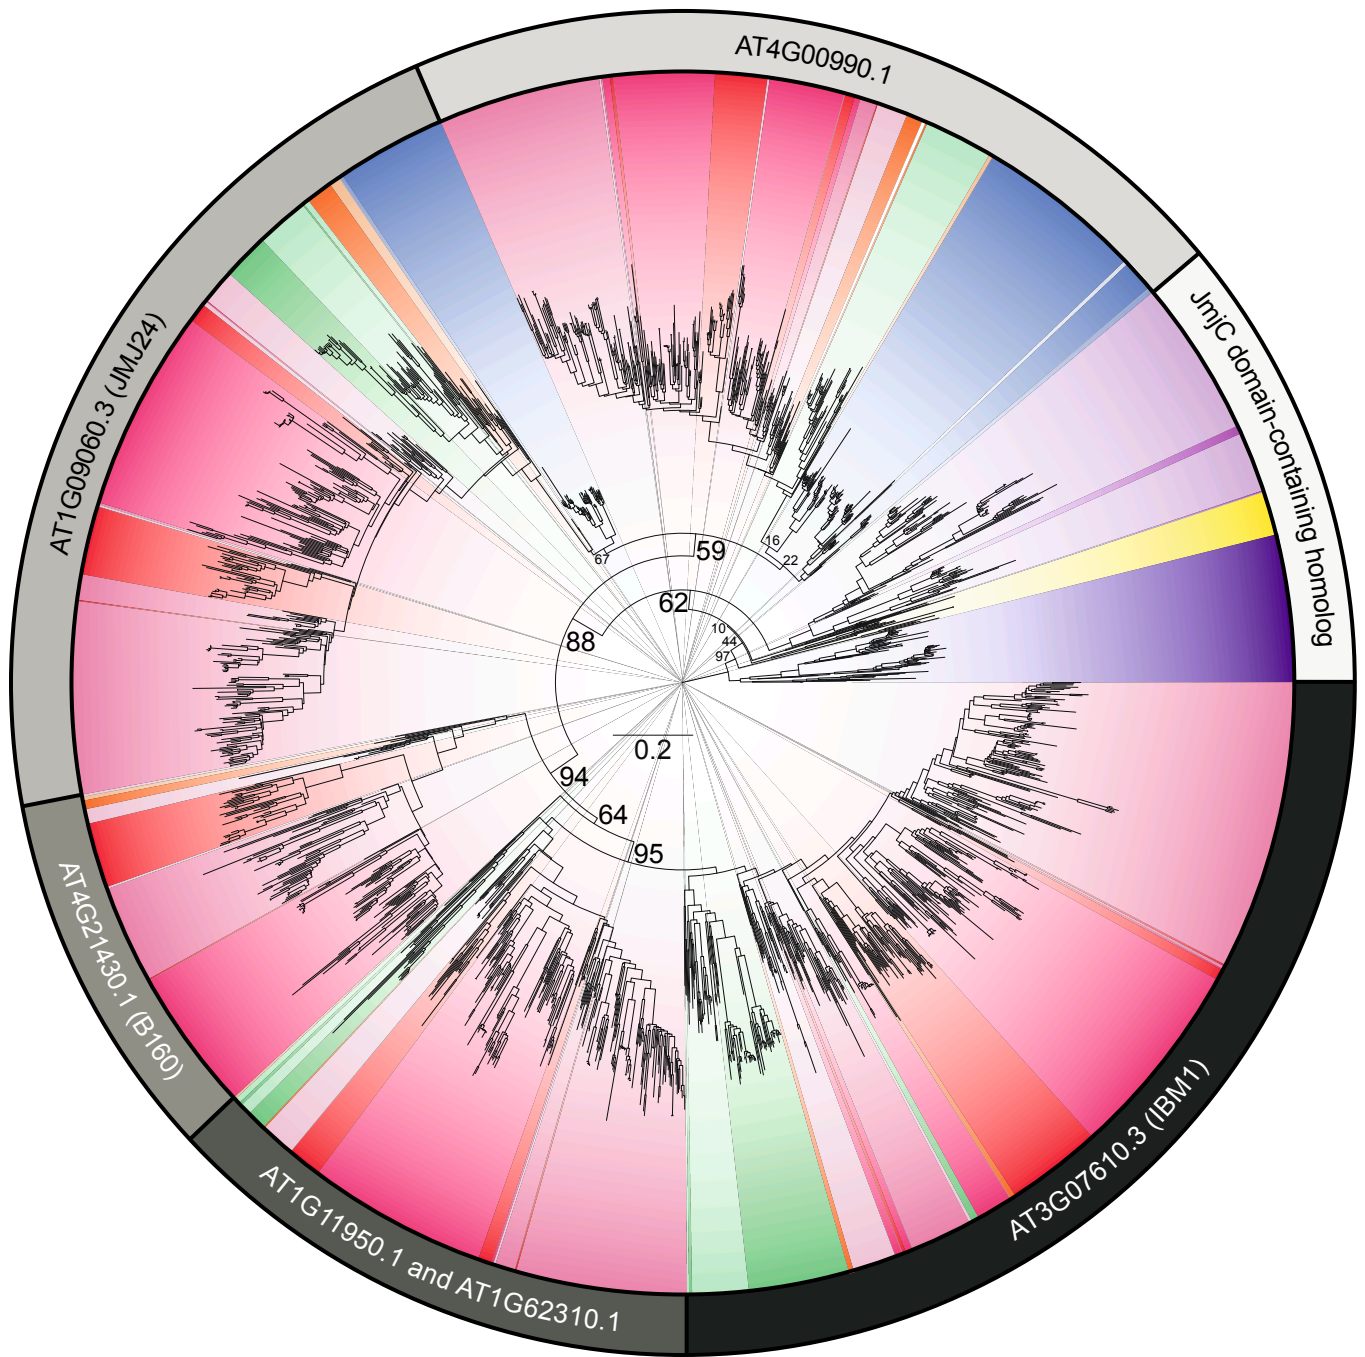

|               |        |          |       |          |          |             |           |          |       |      |        |      |      |        |
|---------------|--------|----------|-------|----------|----------|-------------|-----------|----------|-------|------|--------|------|------|--------|
| Embryophytes  |        |          |       |          |          |             |           |          |       |      |        |      |      |        |
| Tracheophytes |        |          |       |          |          |             |           |          |       |      |        | Bry. |      |        |
| Angiosperms   |        |          |       |          |          | Gymnosperms |           |          | Ferns | Lyc. | Mosses |      |      |        |
| Eudicots      |        |          |       | Monocots |          |             |           |          |       |      |        |      |      |        |
| Core          | Rosids | Asterids | Basal | Com.     | Monocots | Mag.        | Bas.-mos. | Conifers | Cyc.  | Gin. | Eus.   | Lep. | Lyc. | Mosses |





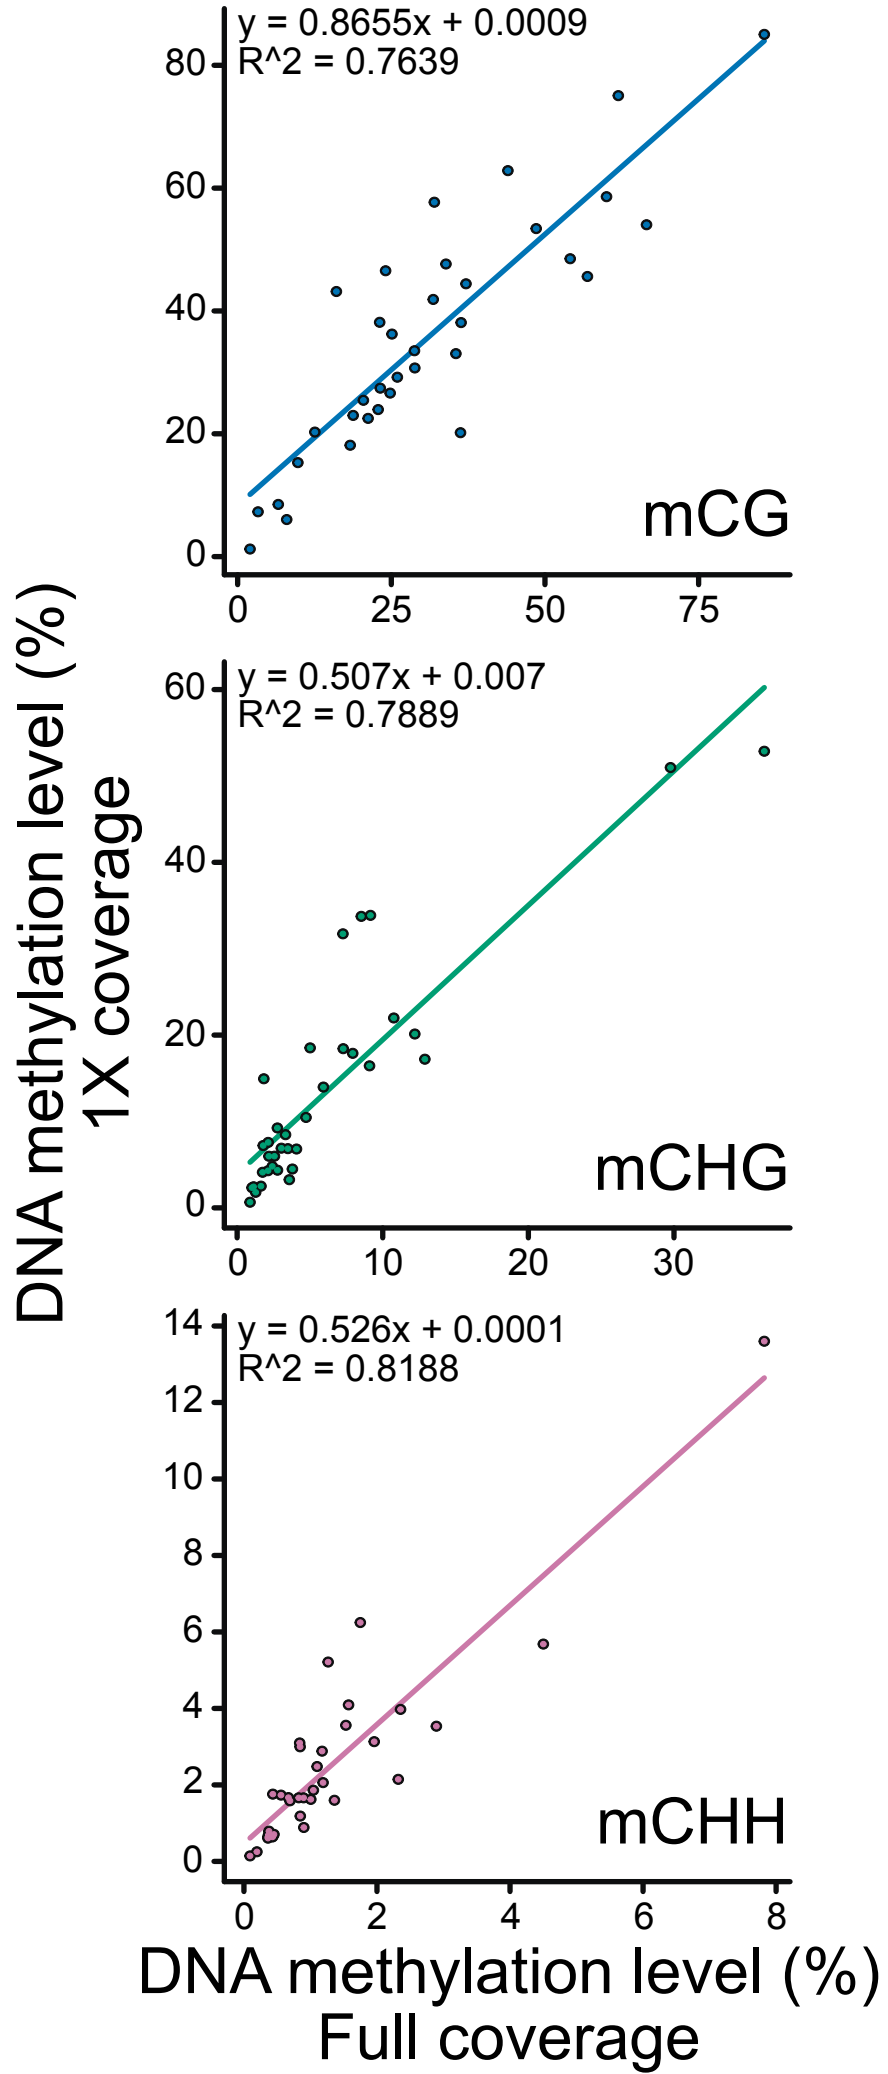

Supplement: Supplementary file [file 054924-1.pdf]
